# Supplementary material for: Genetic Underpinnings of Carotenogenesis and Light-Induced Transcriptome Remodeling in the Opportunistic Pathogen Mycobacterium kansasii
Source: MDPI journal article supplement (doi:10.3390/pathogens12010086), 2023-01-05
Supplement: s1 [file s1]

**Table S2.** Mycobacterial gene expression plasmids used in this study

| Plasmid name                                                    | Characteristics                                                                                                                                                                                  | Source     |
|-----------------------------------------------------------------|--------------------------------------------------------------------------------------------------------------------------------------------------------------------------------------------------|------------|
| pML                                                             | pML1335 derivative lacking the <i>xyIE</i> marker and used as empty vector control                                                                                                               | [85]       |
| pML- <i>crt</i>                                                 | pML derivative carrying <i>MKAN_RS10020</i> to <i>MKAN_RS10050</i> , including the upstream intergenic region containing P1 promoter region                                                      | This study |
| pML- <i>crtE</i>                                                | pML derivative carrying P1 promoter region- <i>MKAN_RS10020</i> fragment                                                                                                                         | This study |
| pML- <i>crtI</i>                                                | pML derivative carrying P1 promoter region + <i>MKAN_RS10025</i> coding region fragment                                                                                                          | This study |
| pML- <i>crtB</i>                                                | pML derivative carrying P1 promoter region + <i>MKAN_RS10030</i> coding region fragment                                                                                                          | This study |
| pML- <i>crtYc</i>                                               | pML derivative carrying P1 promoter region + <i>MKAN_RS10035</i> coding region fragment                                                                                                          | This study |
| pML- <i>crtYd</i>                                               | pML derivative carrying P1 promoter region + <i>MKAN_RS10040</i> coding region fragment                                                                                                          | This study |
| pML <sup>myc</sup> - <i>crtYd</i>                               | pML derivative carrying Pmyc1 promoter + <i>MKAN_RS10040</i> fragment                                                                                                                            | This study |
| pML- <i>crtR</i>                                                | pML derivative carrying P3 promoter region- <i>MKAN_RS10050</i> fragment                                                                                                                         | This study |
| pML- <i>cco1</i> <sup>Mk-part</sup> - <i>ccoR</i> <sup>Mk</sup> | pML derivative carrying <i>MKAN_RS18575</i> - <i>MKAN_RS18580</i> (partial)                                                                                                                      | This study |
| pML <sup>myc</sup> - <i>cco1</i> <sup>Mk</sup>                  | pML derivative carrying Pmyc1 promoter- <i>MKAN_RS18580</i> fragment                                                                                                                             | This study |
| pML <sup>myc</sup> - <i>cco1</i> <sup>Mt</sup>                  | pML derivative carrying Pmyc1 promoter- <i>Rv0654</i> fragment                                                                                                                                   | This study |
| pML- <i>cco1</i> <sup>Mk</sup>                                  | pML derivative carrying native promoter region- <i>MKAN_RS18580</i> fragment                                                                                                                     | This study |
| pML- <i>cco1</i> <sup>Mt</sup>                                  | pML derivative carrying native promoter region- <i>Rv0654</i> fragment                                                                                                                           | This study |
| pML- <i>ccoR</i> <sup>Mk</sup>                                  | pML derivative carrying native promoter region- <i>MKAN_RS18575</i> fragment                                                                                                                     | This study |
| pML- <i>ccoR</i> <sup>Mt</sup>                                  | pML derivative carrying native promoter region- <i>Rv0653c</i> fragment                                                                                                                          | This study |
| pML- <i>fnr1</i>                                                | pML derivative carrying native promoter region- <i>MKAN_RS20530</i> fragment                                                                                                                     | This study |
| pML- <i>desA3</i>                                               | pML derivative carrying native promoter region- <i>MKAN_RS20535</i> fragment                                                                                                                     | This study |
| pCP0h                                                           | pCP0 derivative carrying its native kanamycin resistance cassette and the hygromycin resistance cassette (HpaI-PmeI fragment) from pML1335 inserted into the DraI restriction site of the vector | This study |
