# Supplementary material for: Genetic Underpinnings of Carotenogenesis and Light-Induced Transcriptome Remodeling in the Opportunistic Pathogen Mycobacterium kansasii
Source: MDPI journal article supplement (doi:10.3390/pathogens12010086), 2023-01-05
Supplement: s1 [file s1]

**Table S3.** Primers used in the study

| Name                                     | Sequence (5' → 3')                                                   | Features                                                                                                                                                                                                                                                                                                                                                            |
|------------------------------------------|----------------------------------------------------------------------|---------------------------------------------------------------------------------------------------------------------------------------------------------------------------------------------------------------------------------------------------------------------------------------------------------------------------------------------------------------------|
| <b>Southern blot primers</b>             |                                                                      |                                                                                                                                                                                                                                                                                                                                                                     |
| GG1<br>GG2                               | GACTGGCTGCTATTGGGCGAAG<br>AGAAGGCGATAGAAGGCGATG                      | Primers for PCR-based generation of Tn-specific probe, $\phi$ MycoMarT7 ( $\phi$ MMT7) transposon complementary sequence (NCBI reference sequence AF411123.1) location 1467-1978                                                                                                                                                                                    |
| <b>Complementation construct primers</b> |                                                                      |                                                                                                                                                                                                                                                                                                                                                                     |
| NJ1                                      | AAATTATAAGATAACCAGTTCCTGGTACC<br>TCACCA                              | Forward primer for the generation of pML- <i>crt</i> , containing: PstI site (underlined) and <i>Mycobacterium kansasii</i> ( <i>Mk</i> ) genomic complementary sequence starting at NC_022663.1 (NCBI reference sequence) genomic location 2342585                                                                                                                 |
| NJ2                                      | AAACAATTGGTTCATCGAGGAGCTTCGC<br>ATCT                                 | Reverse primer for the generation of pML- <i>crt</i> and pML- <i>crtR</i> , containing: MfeI site (underlined) and <i>Mk</i> genomic complementary sequence starting at NC_022663.1 genomic location 2350376                                                                                                                                                        |
| NJ3                                      | AAATTATAAGAGACCGGTGAAGCCGGTG<br>AGG                                  | Forward primer for the generation of pML- <i>crtR</i> , containing: PstI site (underlined) and <i>Mk</i> genomic complementary sequence starting at NC_022663.1 genomic location 2349511                                                                                                                                                                            |
| NJ46                                     | AAATCATGAGCCCGCCTAATGGCGGGC<br>TTTTTTTGAATTC                         | Forward primer for the generation of pML- <i>cco1</i> <sup>Mk-part</sup> - <i>ccoR</i> <sup>Mk</sup> containing: BspHI site (underlined), <i>tttA</i> <sup>+</sup> transcriptional terminator from pML1335 (bold) [81], EcoRI site (bold and underlined) and <i>Mk</i> genomic complementary sequence starting at NC_022663.1 genomic location 4262321              |
| NJ47                                     | AAACAATTGGGCCGGCCCTTGGGGTTG<br>CGGTTTCATC                            | Reverse primer for the generation of pML- <i>cco1</i> <sup>Mk-part</sup> - <i>ccoR</i> <sup>Mk</sup> containing: MfeI site (underlined), FseI site (bold and underlined) and <i>Mk</i> genomic complementary sequence starting at NC_022663.1 genomic location 4263914                                                                                              |
| NJ112                                    | TGGCGGGCTTTTTTTTCTTAAGGATAACC<br>AGTTCCTGGTACCTCACCA                 | Forward primer for the generation of pML- <i>crtE</i> , and for the generation of the carotenoid biosynthesis (CRT) locus promoter P1 fragment of pML- <i>crtI</i> , pML- <i>crtB</i> , pML- <i>crtYc</i> and pML- <i>crtYd</i> , containing: AflII site (underlined) and <i>Mk</i> genomic complementary sequence starting at NC_022663.1 genomic location 2342585 |
| NJ102                                    | GGCTCGCCAAGAAGCGGAATCGACGGT<br>GGGT                                  | Reverse primer for the generation of the CRT locus promoter P1 fragment of pML- <i>crtI</i> , pML- <i>crtB</i> , pML- <i>crtYc</i> and pML- <i>crtYd</i> containing: <i>Mk</i> genomic complementary sequence starting at NC_022663.1 genomic location 2343093                                                                                                      |
| NJ101                                    | AAACAATTGTCATGCGGTGCGCTCCACG                                         | Reverse primer for the generation of pML- <i>crtE</i> containing: MfeI site (underlined), <i>Mk</i> genomic complementary sequence starting at NC_022663.1 genomic location 2344128                                                                                                                                                                                 |
| NJ103                                    | GCTACCGATCACCCACCGTCGATTCCG<br>CTTCTTGGCGAGCCATGCGGACCATCC<br>AGGGAC | Forward primer for the generation of pML- <i>crtI</i> containing: <i>Mk</i> genomic complementary sequence from NC_022663.1 genomic location 2343053 to 2343096 (3')                                                                                                                                                                                                |

|       |                                                                                     |                                                                                                                                                                                                                                                                                                                          |
|-------|-------------------------------------------------------------------------------------|--------------------------------------------------------------------------------------------------------------------------------------------------------------------------------------------------------------------------------------------------------------------------------------------------------------------------|
|       |                                                                                     | of P1 promoter, bold) fused to sequence starting at NC_022663.1 genomic location 2344145 (5' of <i>crtI</i> )                                                                                                                                                                                                            |
| NJ104 | <b>CATTAGGCGGGCTCAATTGTCATGACAT</b><br>CTGCGCTTTACGTCGA                             | Reverse primer for the generation of pML- <i>crtI</i> containing: pML1335Δ <i>xyIE</i> sequence (bold), MfeI site (underlined), <i>Mk</i> genomic complementary sequence starting at NC_022663.1 genomic location 2345683                                                                                                |
| NJ105 | <b>ATCACCCACCGTCGATTCCGCTTCTTG</b><br><b>CGAGCCATG</b> ATTACACAACGAGTTAGACG<br>CCGC | Forward primer for the generation of pML- <i>crtB</i> containing: <i>Mk</i> genomic complementary sequence from NC_022663.1 genomic location 2343060 to 2343096 (3' of P1 promoter, bold) fused to sequence starting at NC_022663.1 genomic location 2345683 (5' of <i>crtB</i> )                                        |
| NJ106 | <b>CATTAGGCGGGCTCAATTGTCATGCGG</b><br>CACCCGGCTC                                    | Reverse primer for the generation of pML- <i>crtB</i> containing: pML1335Δ <i>xyIE</i> sequence (bold), MfeI site (underlined), <i>Mk</i> genomic complementary sequence starting at NC_022663.1 genomic location 2346642                                                                                                |
| NJ107 | <b>GATCACCCACCGTCGATTCCGCTTCTTG</b><br><b>GCGAGCCATG</b> AACGATCACTGGCAATA<br>CCTGC | Forward primer for the generation of pML- <i>crtYc</i> containing: <i>Mk</i> genomic complementary sequence from NC_022663.1 genomic location 2343059 to 2343096 (3' of P1 promoter, bold) fused to sequence starting at 2346642 (5' of <i>crtYc</i> )                                                                   |
| NJ108 | <b>CATTAGGCGGGCTCAATTGTCATCGGC</b><br>GGGTGAGCCG                                    | Reverse primer for the generation of pML- <i>crtYc</i> containing: pML1335Δ <i>xyIE</i> sequence (bold), MfeI site (underlined), <i>Mk</i> genomic complementary sequence starting at NC_022663.1 genomic location 2346963                                                                                               |
| NJ109 | <b>ACCGATCACCCACCGTCGATTCCGCTT</b><br><b>CTTGCGAGCCATG</b> ACCGGGCTGGGAT<br>ATACGC  | Forward primer for the generation of pML- <i>crtYd</i> containing: <i>Mk</i> genomic complementary sequence from NC_022663.1 genomic location 2343056 to 2343096 (3' of P1 promoter, bold) fused to sequence starting at 2346962 (5' of <i>crtYd</i> )                                                                   |
| NJ110 | <b>CATTAGGCGGGCTCAATTGTCATCGACG</b><br>CGCTCGCGG                                    | Reverse primer for the generation of pML- <i>crtYd</i> containing: pML1335Δ <i>xyIE</i> sequence (bold), MfeI site (underlined), <i>Mk</i> genomic complementary sequence starting at NC_022663.1 genomic location 2347270                                                                                               |
| NJ147 | <b>AAACTTAAGGAAGGAGATATACAT</b> ATGA<br>CCGGGCTGGGATATACGC                          | Forward primer for the generation of pML <sup>myc</sup> - <i>crtYd</i> , containing: AflII site (underlined), ribosome binding site (bold) and spacer (bold, underlined) from pSE100 and <i>Mk</i> genomic complementary sequence starting at NC_022663.1 genomic location 2346959                                       |
| NJ145 | <b>AAACCTGCAGGTCATCGACGCGCTCGC</b><br>GG                                            | Reverse primer for the generation of pML <sup>myc</sup> - <i>crtYd</i> , containing: SbfI site (underlined) and <i>Mk</i> genomic complementary sequence starting at NC_022663.1 genomic location 2347270                                                                                                                |
| NJ64  | <b>AAACTTAAGGAAGGAGATATACAT</b> GTGA<br>CGACAATGCGAACTGCC                           | Forward primer for the generation of pML <sup>myc</sup> - <i>cco1<sup>Mk</sup></i> , containing: AflII site (underlined), ribosome binding site (bold) and spacer (bold, underlined) from pSE100 and <i>Mk</i> genomic complementary sequence starting at NC_022663.1 (NCBI reference sequence) genomic location 4263096 |
| NJ65  | <b>AAACCTGCAGGTC</b> AAGGAGTCGCCGGT<br>GC                                           | Reverse primer for the generation of pML <sup>myc</sup> - <i>cco1<sup>Mk</sup></i> , containing: SbfI site (underlined) and <i>Mk</i> genomic complementary sequence starting at NC_022663.1 genomic location 4264616                                                                                                    |
| NJ66  | <b>AAACTTAAGGAAGGAGATATACAT</b> ATGA<br>CCACCGCACAAAGCC                             | Forward primer for the generation of pML <sup>myc</sup> - <i>cco1<sup>Mt</sup></i> , containing: AflII site (underlined), ribosome binding site (bold) and spacer (bold, underlined) from pSE100 and                                                                                                                     |

|       |                                                                     |                                                                                                                                                                                                                                                                                               |
|-------|---------------------------------------------------------------------|-----------------------------------------------------------------------------------------------------------------------------------------------------------------------------------------------------------------------------------------------------------------------------------------------|
|       |                                                                     | <i>Mycobacterium tuberculosis</i> ( <i>Mt</i> ) genomic complementary sequence starting at NC_000962.3 (NCBI reference sequence) genomic location 750000                                                                                                                                      |
| NJ67  | AAACCTGCAGGTCAGGTGGTCGGCGCC<br>CA                                   | Reverse primer for the generation of pML <sup>myc-cco1<sup>Mt</sup></sup> , containing: SbfI site (underlined) and <i>Mt</i> genomic complementary sequence starting at NC_000962.3 genomic location 751505                                                                                   |
| NJ111 | AAACTTAAGTCAGCGGGTTTGCAGGGCA<br>TCGGGT                              | Forward primer for the generation of pML-cco1 <sup>Mk</sup> , containing: AflII site (underlined), stop codon (bold) and <i>Mk</i> genomic complementary sequence starting at NC_022663.1 genomic location 4262909                                                                            |
| NJ78  | AAACAATTGTCAAGGAGTCGCCGGTGCC<br>C                                   | Reverse primer for the generation of pML-cco1 <sup>Mk</sup> containing: MfeI site (underlined), and <i>Mt</i> genomic complementary sequence starting at NC_022663.1 genomic location 4264616                                                                                                 |
| NJ79  | AAACTTAAGCCTTGCCATGTTCTCACCA<br>GGGCG                               | Forward primer for the generation of pML-cco1 <sup>Mt</sup> , containing: AflII site (underlined) and <i>Mt</i> genomic complementary sequence starting at NC_000962.3 genomic location 749930                                                                                                |
| NJ80  | AAACAATTGTCAGGTGGTCGGCGCCCA<br>G                                    | Reverse primer for the generation of pML-cco1 <sup>Mt</sup> containing: MfeI site (underlined), and <i>Mt</i> genomic complementary sequence starting at NC_000962.3 genomic location 751505                                                                                                  |
| NJ56  | AAATCATGAGCCCGCCTAATGGCGGGC<br>TTTTTTTCTTAAGTCAACCGAAAGCGGA<br>GCGC | Forward primer for the generation of pML-ccoR <sup>Mk</sup> containing: BspHI site (underlined), <i>ttrpA</i> + transcriptional terminator from pML1335 (bold), AflII site (bold, underlined) and <i>Mk</i> genomic complementary sequence starting at NC_022663.1 genomic location 4262322   |
| NJ57  | AAACAATTGGGCGGCCCTTCGCATTGTC<br>GTCACGGCCGA                         | Reverse primer for the generation of pML-ccoR <sup>Mk</sup> containing: MfeI site (underlined), FseI site (bold) and <i>Mk</i> genomic complementary sequence starting at NC_022663.1 genomic location 4263111                                                                                |
| NJ58  | AAATCATGAGCCCGCCTAATGGCGGGC<br>TTTTTTTCTTAAGTCAAGTAGCTCTGCC<br>CAGC | Forward primer for the generation of pML-ccoR <sup>Mt</sup> containing: BspHI site (bold), <i>ttrpA</i> + transcriptional terminator from pML1335 (underlined), AflII site (bold and underlined) and <i>Mt</i> genomic complementary sequence starting at NC_000962.3 genomic location 749235 |
| NJ59  | AAACAATTGGGCGGCCGGCGGCTTGT<br>GCGGTGGTCAT                           | Reverse primer for the generation of pML-ccoR <sup>Mt</sup> containing: MfeI site (underlined), FseI site (bold) and <i>Mt</i> genomic complementary sequence starting at NC_000962.3 genomic location 750020                                                                                 |
| NJ119 | AAACTTAAGCCGCAGACGCCTCGAAGCC<br>T                                   | Forward primer for the generation of pML- <i>fnr1</i> , containing: AflII site (underlined), and <i>Mt</i> genomic complementary sequence starting at NC_000962.3 genomic location 4704636                                                                                                    |
| NJ121 | AAACAATTGTTAGATGTCGACCACACAAT<br>CGCCCGAGGCA                        | Reverse primer for the generation of pML- <i>fnr1</i> containing: MfeI site (underlined), and <i>Mt</i> genomic complementary sequence starting at NC_000962.3 genomic location 4706005                                                                                                       |
| NJ122 | AAACTTAAGGCCGGATGGGGATCTGTCA<br>ATCGT                               | Forward primer for the generation of pML- <i>desA3</i> , containing: AflII site (underlined), and <i>Mt</i> genomic complementary sequence starting at NC_000962.3 genomic location 4705860                                                                                                   |

|                                          |                                                     |                                                                                                                                                                                                                                              |
|------------------------------------------|-----------------------------------------------------|----------------------------------------------------------------------------------------------------------------------------------------------------------------------------------------------------------------------------------------------|
| NJ120                                    | AAACAATTGTCAGGCCGCCAGGTCCGCT                        | Reverse primer for the generation of pML- <i>desA3</i> containing: MfeI site (underlined), and <i>Mt</i> genomic complementary sequence starting at NC_000962.3 genomic location 4707355                                                     |
| <b>Plasmid rescue method primers</b>     |                                                     |                                                                                                                                                                                                                                              |
| CB2                                      | GAGATAGGGTTGAGTGTGTTCC                              | Reverse (relative to the kanamycin-resistance cassette ( $Km^R$ )), outward-facing sequencing primer starting at $\phi$ MMT7 transposon complementary sequence (NCBI reference sequence AF411123.1) location 84; see Budell et al. 2020 [38] |
| SR2b                                     | CGCTTCCTCGTGCTTTACGGTATCGC                          | Forward (relative to $Km^R$ ), outward-facing sequencing primer starting at $\phi$ MMT7 transposon complementary sequence (AF411123.1) location 1914; see Budell et al. 2020 [38]                                                            |
| <b>AP-PCR method primers</b>             |                                                     |                                                                                                                                                                                                                                              |
| TR-1                                     | GGATCTGGTCCGCGCACATT                                | Reverse, transposon primer for the first round of arbitrarily primed PCR (AP-PCR), starting at $\phi$ MMT7 transposon complementary sequence (AF411123.1) location 240                                                                       |
| ARB-1b                                   | GCGCTCACAGCAGTCGAGTCGAGANNN<br>NNNNNNN <b>CGGCG</b> | Forward, arbitrary primer for the first round of AP-PCR, containing an adapter sequence, a stretch of random nucleotides (N) and a pentameric sequence common in the <i>Mk</i> genome (bold)                                                 |
| TR-2                                     | CCAATAGGCCGAAATCGGCAAATCCCT                         | Reverse, transposon primer for the second round of AP-PCR, starting at $\phi$ MMT7 transposon complementary sequence (AF411123.1) location 133; This primer is also used for sequencing of PCR products.                                     |
| ARB-2                                    | GCGCTCACAGCAGTCGAGTCGAGA                            | Forward primer for the second round of AP-PCR, binding to the adapter sequence of the PCR fragment created with primer ARB-1b in the first round of AP-PCR                                                                                   |
| <b>Locus-targeted PCR method primers</b> |                                                     |                                                                                                                                                                                                                                              |
| NJ1                                      | AAATTATAAGATAACCAGTTCCTGGTACC<br>TCACCA             | Forward (NJ1) and reverse (NJ37) primers for fragment 1 of the <i>Mk</i> carotenoid biosynthesis locus (CRT locus), NC_022663.1 genomic complementary sequence location 2342585 – 2344674, yielding a 2099 bp fragment                       |
| NJ37                                     | ATGGCGTCCCAGTTGCGGAAT                               |                                                                                                                                                                                                                                              |
| NJ8                                      | GGCTGTACCGCACCGAAAT                                 | Forward (NJ8) and reverse (NJ38) primers for fragment number 2 of the <i>Mk</i> CRT locus, NC_022663.1 genomic complementary sequence location 2344554 – 2346653, yielding a 2100 bp fragment                                                |
| NJ38                                     | CCAGTGATCGTTCATGCGGCA                               |                                                                                                                                                                                                                                              |
| NJ13                                     | GACGATTTGAGGTGTTCACTCA                              | Forward (NJ13) and reverse (NJ39) primers for fragment number 3 of the <i>Mk</i> CRT, NC_022663.1 genomic complementary sequence location 2346499 – 2348334, yielding a 1836 bp fragment                                                     |
| NJ39                                     | CCGTACGTTGAGCGCATCGA                                |                                                                                                                                                                                                                                              |
| NJ17                                     | TCGCGGTCGTGGTCTTTT                                  | Forward (NJ17) and reverse (NJ2) primers for fragment number 3 of the <i>Mk</i> CRT, NC_022663.1 genomic complementary sequence location 2348240 – 2350376, yielding a 2146 bp fragment                                                      |
| NJ2                                      | AAACAATTGGTTCATCGAGGAGCTTCGC<br>ATCT                |                                                                                                                                                                                                                                              |

|                 |                            |                                                                                                                                                                                                                                                                                    |
|-----------------|----------------------------|------------------------------------------------------------------------------------------------------------------------------------------------------------------------------------------------------------------------------------------------------------------------------------|
| NJ156           | GGCCCAGCACGCAATCACCAGGA    | Forward (NJ156) and reverse (NJ157) primers for a fragment of the <i>Mk</i> CRT locus containing <i>MKAN_RS10035</i> and <i>MKAN_RS10040</i> ( <i>crtYc</i> and <i>crtYd</i> ), NC_022663.1 genomic complementary sequence location 2346366 – 2347539, yielding a 1174 bp fragment |
| NJ157           | GCCACTGTCCGAGTTCACCAGCAGCA |                                                                                                                                                                                                                                                                                    |
| RT-qPCR primers |                            |                                                                                                                                                                                                                                                                                    |
| NJ81            | CCAGCCCCGTACTCTCGACGA      | Forward (NJ81) and reverse (CB11, see Budell et al. 2020 [38]) RT-qPCR primers for <i>MKAN_RS24220</i> ( <i>sigA</i> ), amplifying <i>Mk</i> NC_022663.1 genomic complementary sequence location 5589256 – 5589392, yielding a 133-bp amplicon                                     |
| CB11            | ATCCAGGTAGTCGCGCAGGACT     |                                                                                                                                                                                                                                                                                    |
| NJ82            | CTGCGGACCGTCCTCGACAT       | Forward (NJ82) and reverse (NJ83) RT-qPCR primers for <i>MKAN_RS10020</i> ( <i>crtE</i> ), amplifying <i>Mk</i> NC_022663.1 genomic complementary sequence location 2343625 – 2343758, yielding a 133-bp amplicon                                                                  |
| NJ83            | ATCGGCACCGTAGAGCCCGA       |                                                                                                                                                                                                                                                                                    |
| NJ148           | CTCGACGTTGTCACCCCGCT       | Forward (NJ148) and reverse (NJ149) RT-qPCR primers for <i>MKAN_RS10025</i> ( <i>crtI</i> ), amplifying <i>Mk</i> NC_022663.1 genomic complementary sequence location 2345402 – 2345530, yielding a 129-bp amplicon                                                                |
| NJ149           | ATTGTCGACGCCGCGAACCA       |                                                                                                                                                                                                                                                                                    |
| NJ150           | GGCAACCGCTTTGACGCTGTACT    | Forward (NJ150) and reverse (NJ151) RT-qPCR primers for <i>MKAN_RS10030</i> ( <i>crtB</i> ), amplifying <i>Mk</i> NC_022663.1 genomic complementary sequence location 2346450 - 2346584, yielding a 135-bp amplicon                                                                |
| NJ151           | CAGGCTTGGATCAGTCCGGCT      |                                                                                                                                                                                                                                                                                    |
| NJ152           | GTGGCCGTTCCGTTTCGGGT       | Forward (NJ152) and reverse (NJ153) RT-qPCR primers for <i>MKAN_RS10035</i> ( <i>crtYc</i> ), amplifying <i>Mk</i> NC_022663.1 genomic complementary sequence location 2346843 - 2346954, yielding a 112-bp amplicon                                                               |
| NJ153           | GGGTGAGCCGATCGAGAATCGT     |                                                                                                                                                                                                                                                                                    |
| NJ154           | AAACGACGGGCCTGCGGTT        | Forward (NJ154) and reverse (NJ155) RT-qPCR primers for <i>MKAN_RS10040</i> ( <i>crtYd</i> ), amplifying <i>Mk</i> NC_022663.1 genomic complementary sequence location 2347158 - 2347277, yielding a 120-bp amplicon                                                               |
| NJ155           | GGCGACTTCATCGACGCGCT       |                                                                                                                                                                                                                                                                                    |
| NJ84            | ACCTCACGTTTGCCGGTGGT       | Forward (NJ84) and reverse (NJ85) RT-qPCR primers for <i>MKAN_RS10045</i> ( <i>mmpL1</i> ), amplifying <i>Mk</i> NC_022663.1 genomic complementary sequence location 2348923 - 2349052, yielding a 130-bp amplicon                                                                 |
| NJ85            | AAGCCGCTGTGAGGGAAAGCA      |                                                                                                                                                                                                                                                                                    |

|      |                          |                                                                                                                                                                                                                        |
|------|--------------------------|------------------------------------------------------------------------------------------------------------------------------------------------------------------------------------------------------------------------|
| NJ86 | GCAGCATGGAGTTGGCTCACGA   | Forward (NJ86) and reverse (NJ87) RT-qPCR primers for <i>MKAN_RS10050 (crtR)</i> , amplifying <i>Mk</i> NC_022663.1 genomic complementary sequence location 2350031 - 2350168, yielding a 138-bp amplicon              |
| NJ87 | CAAATGCAGACATCCCCGCGATCA |                                                                                                                                                                                                                        |
| NJ89 | TCGCTACGGTGAACTGCGCT     | Forward (NJ89) and reverse (NJ88) RT-qPCR primers for <i>MKAN_RS10055 (fni)</i> , amplifying <i>Mk</i> NC_022663.1 genomic complementary sequence location 2350482 - 2350593, yielding a 134-bp amplicon               |
| NJ88 | CGTCCATCCCGGTGCGGATA     |                                                                                                                                                                                                                        |
| NJ91 | CCATCGAGCGGCCGCATATGT    | Forward (NJ91) and reverse (NJ90) RT-qPCR primers for <i>MKAN_RS18575 (ccoR<sup>Mk</sup>)</i> , amplifying <i>Mk</i> NC_022663.1 genomic complementary sequence location 4262594 - 4262724, yielding a 131-bp amplicon |
| NJ90 | ATGCGCGAAGCTGGGATGGT     |                                                                                                                                                                                                                        |
| NJ92 | CCGCTCAACGCCTACACCGA     | Forward (NJ92) and reverse (NJ93) RT-qPCR primers for <i>MKAN_RS18580 (cco1<sup>Mk</sup>)</i> , amplifying <i>Mk</i> NC_022663.1 genomic complementary sequence location 4264038 - 4264165, yielding a 128-bp amplicon |
| NJ93 | CGATCCAGTGACGGACGGGTGT   |                                                                                                                                                                                                                        |
