# Supplementary material for: Genetic Underpinnings of Carotenogenesis and Light-Induced Transcriptome Remodeling in the Opportunistic Pathogen Mycobacterium kansasii
Source: Pathogens. 2023 Jan 5;12(1):86. doi: 10.3390/pathogens12010086 (PMC9861118; doi:10.3390/pathogens12010086)
Supplement: Supplementary file 1 [file pathogens-12-00086-s001.zip]

Archive with 20 entries (20 files):
- Figure S1_Janisch et al.tif
- Figure S2a_Janisch et al.tif
- Figure S2b_Janisch et al.tif
- Figure S2c_Janisch et al.tif
- Figure S2d_Janisch et al.tif
- Figure S2e_Janisch et al.tif
- Figure S2f_Janisch et al.tif
- Figure S2g_Janisch et al.tif
- Figure S2h_Janisch et al.tif
- Figure S2i_Janisch et al.tif
- Figure S3_Janisch et al.tif
- Figure S4_Janisch et al.tif
- Figure S5_Janisch et al.tif
- Figure S6_Janisch et al.tif
- Figure S7_Janisch et al.tif
- Supplementary Figure Captions_Janisch et al.pdf
- Supplementary HAGRID Method_Janisch et al.pdf
- Table S1_Janisch et al.xlsx
- Table S2_Janisch et al.pdf
- Table S3_Janisch et al.pdf
