# Supplementary material for: Genetic Underpinnings of Carotenogenesis and Light-Induced Transcriptome Remodeling in the Opportunistic Pathogen Mycobacterium kansasii
Source: Pathogens. 2023 Jan 5;12(1):86. doi: 10.3390/pathogens12010086 (PMC9861118; doi:10.3390/pathogens12010086)
Supplement: Supplementary file 1 [file pathogens-12-00086-s001.zip › Table S1_Janisch et al.xlsx]

## Sheet: Identified Pigmentation Mutants
Janisch et al.
Table S1. Transposon insertion sites in M. kansasii isolates
Name	Color (dark)	Color (light)	Insertion site (T of TA site)	Gene name/Locus tag	Gene function	Tn orientation (relative to gene)1	Distance into gene
1Orientation relative to the KmR marker of the Tn and the ORF harboring the insertion. Co: Tn marker and M. kansasii ORF are oriented in the same direction; Op: Tn marker and M. kansasii ORF have opposing orientations. For intergenic insertions, the Tn orientation is relative to the orientation of the adjacent M. kansasii ORF indicated in parentheses.
Tn insertions associated with the carotenoid biosynthesis (CRT) locus
Insertions in front of crtE
MK145	yellow	yellow	2342291	MKAN_RS31895	glycosyl hydrolase family 12	Co (crtE)	0.75
MK146	yellow	yellow	2342291	MKAN_RS31895	glycosyl hydrolase family 12	Co (crtE)	0.75
MK147	yellow	yellow	2342301	MKAN_RS31895	glycosyl hydrolase family 12	Co (crtE)	0.76
MK148	yellow	yellow	2342492	MKAN_RS31895	glycosyl hydrolase family 12	Co (crtE)	0.88
MK149	yellow	yellow	2342492	MKAN_RS31895	glycosyl hydrolase family 12	Co (crtE)	0.88
MK150	yellow	yellow	2342508	MKAN_RS31895	glycosyl hydrolase family 12	Co (crtE)	0.89
MK151	yellow	yellow	2343006	MKAN_RS31895/MKAN_RS10020		Co (crtE)	Intergenic
MK152	yellow	yellow	2342854	MKAN_RS31895/MKAN_RS10020		Co (crtE)	Intergenic
MK153	yellow	yellow	2342826	MKAN_RS31895/MKAN_RS10020		Co (crtE)	Intergenic
MK154	yellow	yellow	2342848	MKAN_RS31895/MKAN_RS10020		Co (crtE)	Intergenic
MK155	white	white	2343007	MKAN_RS31895/MKAN_RS10020		Op (crtE)	Intergenic
Insertions in crtE
MK24	yellow	yellow	2343241	crtE (MKAN_RS10020)	polyprenyl synthetase family protein	Co (crtE)	0.14
MK25	white	white	2343242	crtE (MKAN_RS10020)	polyprenyl synthetase family protein	Op (crtE)	0.14
MK26	white	white	2343242	crtE (MKAN_RS10020)	polyprenyl synthetase family protein	Op (crtE)	0.14
MK27	white	white	2343242	crtE (MKAN_RS10020)	polyprenyl synthetase family protein	Op (crtE)	0.14
MK28	white	white	2343411	crtE (MKAN_RS10020)	polyprenyl synthetase family protein	Op (crtE)	0.31
MK29	yellow	yellow	2343667	crtE (MKAN_RS10020)	polyprenyl synthetase family protein	Co (crtE)	0.55
MK30	yellow	yellow	2343667	crtE (MKAN_RS10020)	polyprenyl synthetase family protein	Co (crtE)	0.55
MK31	white	white	2343746	crtE (MKAN_RS10020)	polyprenyl synthetase family protein	Op (crtE)	0.63
MK32	white	white	2343746	crtE (MKAN_RS10020)	polyprenyl synthetase family protein	Op (crtE)	0.63
MK33	white	white	2343746	crtE (MKAN_RS10020)	polyprenyl synthetase family protein	Op (crtE)	0.63
MK34	white	white	2343746	crtE (MKAN_RS10020)	polyprenyl synthetase family protein	Op (crtE)	0.63
MK35	yellow	yellow	2343788	crtE (MKAN_RS10020)	polyprenyl synthetase family protein	Co (crtE)	0.67
MK36	white	white	2343789	crtE (MKAN_RS10020)	polyprenyl synthetase family protein	Op (crtE)	0.67
MK37	white	white	2343789	crtE (MKAN_RS10020)	polyprenyl synthetase family protein	Op (crtE)	0.67
MK38	yellow	yellow	2343974	crtE (MKAN_RS10020)	polyprenyl synthetase family protein	Co (crtE)	0.85
MK40	yellow	yellow	2343241	crtE (MKAN_RS10020)	polyprenyl synthetase family protein	Co (crtE)	0.14
MK156	white	white	2343242	crtE (MKAN_RS10020)	polyprenyl synthetase family protein	Op (crtE)	0.14
Insertions in front of crtI
MK39	white	white	2344130	MKAN_RS10020/MKAN_RS10025		Op (crtI)	Intergenic
MK41	white	white	2344130	MKAN_RS10020/MKAN_RS10025		Op (crtI)	Intergenic
MK42	yellow	yellow	2344129	MKAN_RS10020/MKAN_RS10025		Co (crtI)	Intergenic
MK43	yellow	yellow	2344129	MKAN_RS10020/MKAN_RS10025		Co (crtI)	Intergenic
MK44	yellow	yellow	2344129	MKAN_RS10020/MKAN_RS10025		Co (crtI)	Intergenic
MK45	yellow	yellow	2344129	MKAN_RS10020/MKAN_RS10025		Co (crtI)	Intergenic
Insertions in crtI
MK46	white	white	2344359	crtI (MKAN_RS10025)	phytoene desaturase family protein	Co (crtI)	0.14
MK47	white	white	2344559	crtI (MKAN_RS10025)	phytoene desaturase family protein	Co (crtI)	0.27
MK48	white	white	2344784	crtI (MKAN_RS10025)	phytoene desaturase family protein	Co (crtI)	0.42
MK49	white	white	2344785	crtI (MKAN_RS10025)	phytoene desaturase family protein	Op (crtI)	0.42
MK50	white	white	2345206	crtI (MKAN_RS10025)	phytoene desaturase family protein	Op (crtI)	0.69
MK51	white	white	2345267	crtI (MKAN_RS10025)	phytoene desaturase family protein	Op (crtI)	0.73
MK52	white	white	2345268	crtI (MKAN_RS10025)	phytoene desaturase family protein	Op (crtI)	0.73
MK53	white	white	2345268	crtI (MKAN_RS10025)	phytoene desaturase family protein	Op (crtI)	0.73
Insertions in crtB
MK54	white	white	2345775	crtB (MKAN_RS10030)	phytoene/squalene synthase family protein	Co (crtB)	0.1
MK55	white	white	2345775	crtB (MKAN_RS10030)	phytoene/squalene synthase family protein	Co (crtB)	0.1
MK56	white	white	2345775	crtB (MKAN_RS10030)	phytoene/squalene synthase family protein	Co (crtB)	0.1
MK57	white	white	2345776	crtB (MKAN_RS10030)	phytoene/squalene synthase family protein	Op (crtB)	0.1
MK58	white	white	2345776	crtB (MKAN_RS10030)	phytoene/squalene synthase family protein	Op (crtB)	0.1
MK59	white	white	2345837	crtB (MKAN_RS10030)	phytoene/squalene synthase family protein	Op (crtB)	0.16
MK60	white	white	2345837	crtB (MKAN_RS10030)	phytoene/squalene synthase family protein	Op (crtB)	0.16
MK61	white	white	2346002	crtB (MKAN_RS10030)	phytoene/squalene synthase family protein	Op (crtB)	0.33
MK62	white	white	2346097	crtB (MKAN_RS10030)	phytoene/squalene synthase family protein	Co (crtB)	0.43
MK63	white	white	2346098	crtB (MKAN_RS10030)	phytoene/squalene synthase family protein	Op (crtB)	0.43
MK64	white	white	2346098	crtB (MKAN_RS10030)	phytoene/squalene synthase family protein	Op (crtB)	0.43
MK65	white	white	2346263	crtB (MKAN_RS10030)	phytoene/squalene synthase family protein	Op (crtB)	0.61
MK66	white	white	2346350	crtB (MKAN_RS10030)	phytoene/squalene synthase family protein	Co (crtB)	0.7
MK67	white	white	2346351	crtB (MKAN_RS10030)	phytoene/squalene synthase family protein	Op (crtB)	0.7
MK68	white	white	2346355	crtB (MKAN_RS10030)	phytoene/squalene synthase family protein	Op (crtB)	0.7
MK69	white	white	2346470	crtB (MKAN_RS10030)	phytoene/squalene synthase family protein	Op (crtB)	0.82
Insertions in crtYc
MK70	white	orange	2346658	crtYc (MKAN_RS10035)	lycopene cyclase domain-containing protein	Op (crtYc)	0.06
MK71	white	orange	2346812	crtYc (MKAN_RS10035)	lycopene cyclase domain-containing protein	Op (crtYc)	0.53
MK157	white	orange	2346658	crtYc (MKAN_RS10035)	lycopene cyclase domain-containing protein	Op (crtYc)	0.06
MK158	white	orange	2346820	crtYc (MKAN_RS10035)	lycopene cyclase domain-containing protein	Op (crtYc)	0.56
MK159	white	orange	2346832	crtYc (MKAN_RS10035)	lycopene cyclase domain-containing protein	Op (crtYc)	0.6
MK160	white	orange	2346834	crtYc (MKAN_RS10035)	lycopene cyclase domain-containing protein	Op (crtYc)	0.6
MK161	white	orange	2346834	crtYc (MKAN_RS10035)	lycopene cyclase domain-containing protein	Op (crtYc)	0.6
MK162	white	orange	2346834	crtYc (MKAN_RS10035)	lycopene cyclase domain-containing protein	Op (crtYc)	0.6
MK163	white	orange	2346869	crtYc (MKAN_RS10035)	lycopene cyclase domain-containing protein	Op (crtYc)	0.71
MK164	white	orange	2346869	crtYc (MKAN_RS10035)	lycopene cyclase domain-containing protein	Op (crtYc)	0.86
Insertions in crtYd
MK72	white	orange	2346977	crtYd (MKAN_RS10040)	lycopene cyclase domain-containing protein	Op (crtYd)	0.06
MK73	white	orange	2347146	crtYd (MKAN_RS10040)	lycopene cyclase domain-containing protein	Op (crtYd)	0.6
MK165	white	orange	2346975	crtYd (MKAN_RS10040)	lycopene cyclase domain-containing protein	Op (crtYd)	0.05
MK166	white	orange	2346977	crtYd (MKAN_RS10040)	lycopene cyclase domain-containing protein	Op (crtYd)	0.06
MK167	white	orange	2347146	crtYd (MKAN_RS10040)	lycopene cyclase domain-containing protein	Op (crtYd)	0.6
MK168	white	orange	2347146	crtYd (MKAN_RS10040)	lycopene cyclase domain-containing protein	Op (crtYd)	0.6
MK169	white	orange	2347146	crtYd (MKAN_RS10040)	lycopene cyclase domain-containing protein	Op (crtYd)	0.6
MK170	white	orange	2347146	crtYd (MKAN_RS10040)	lycopene cyclase domain-containing protein	Op (crtYd)	0.6
MK171	white	orange	2347146	crtYd (MKAN_RS10040)	lycopene cyclase domain-containing protein	Op (crtYd)	0.6
Insertions in front of crtR
MK74	yellow	yellow	2349610	MKAN_RS10045/MKAN_RS10050		Op (crtR)	Intergenic
MK75	white	white	2349663	MKAN_RS10045/MKAN_RS10050		Co (crtR)	Intergenic
MK76	yellow	yellow	2349610	MKAN_RS10045/MKAN_RS10050		Op (crtR)	Intergenic
MK77	yellow	yellow	2349581	MKAN_RS10045/MKAN_RS10050		Op (crtR)	Intergenic
Insertions in crtR
MK78	red	red	2349806	crtR (MKAN_RS10050)	MarR family transcriptional regulator	Co (crtR)	0.18
MK79	red	red	2349806	crtR (MKAN_RS10050)	MarR family transcriptional regulator	Co (crtR)	0.18
MK80	red	red	2349940	crtR (MKAN_RS10050)	MarR family transcriptional regulator	Co (crtR)	0.39
MK81	red	red	2350133	crtR (MKAN_RS10050)	MarR family transcriptional regulator	Co (crtR)	0.69
MK82	yellow	yellow	2350181	crtR (MKAN_RS10050)	MarR family transcriptional regulator	Op (crtR)	0.77
MK172	red	red	2349805	crtR (MKAN_RS10050)	MarR family transcriptional regulator	Op (crtR)	0.18
Tn insertions associated with the carotenoid cleavage oxygenase (CCO) locus
Insertions in ccoRMk
MK91	white	white	4262869	ccoRMk (MKAN_RS18575)	TetR/AcrR family transcriptional regulator	Op (ccoRMk)	0.21
MK92	white	white	4262757	ccoRMk (MKAN_RS18575)	TetR/AcrR family transcriptional regulator	Op (ccoRMk)	0.37
MK93	white	white	4262757	ccoRMk (MKAN_RS18575)	TetR/AcrR family transcriptional regulator	Op (ccoRMk)	0.37
MK94	white	white	4262708	ccoRMk (MKAN_RS18575)	TetR/AcrR family transcriptional regulator	Op (ccoRMk)	0.44
MK95	white	white	4262708	ccoRMk (MKAN_RS18575)	TetR/AcrR family transcriptional regulator	Op (ccoRMk)	0.44
MK96	white	white	4262708	ccoRMk (MKAN_RS18575)	TetR/AcrR family transcriptional regulator	Op (ccoRMk)	0.44
MK97	white	white	4262707	ccoRMk (MKAN_RS18575)	TetR/AcrR family transcriptional regulator	Co (ccoRMk)	0.44
MK98	white	white	4262707	ccoRMk (MKAN_RS18575)	TetR/AcrR family transcriptional regulator	Co (ccoRMk)	0.44
MK99	white	white	4262707	ccoRMk (MKAN_RS18575)	TetR/AcrR family transcriptional regulator	Co (ccoRMk)	0.44
MK100	white	white	4262707	ccoRMk (MKAN_RS18575)	TetR/AcrR family transcriptional regulator	Co (ccoRMk)	0.44
MK101	white	white	4262707	ccoRMk (MKAN_RS18575)	TetR/AcrR family transcriptional regulator	Co (ccoRMk)	0.44
MK102	white	white	4262707	ccoRMk (MKAN_RS18575)	TetR/AcrR family transcriptional regulator	Co (ccoRMk)	0.44
MK103	white	white	4262707	ccoRMk (MKAN_RS18575)	TetR/AcrR family transcriptional regulator	Co (ccoRMk)	0.44
MK104	white	white	4262707	ccoRMk (MKAN_RS18575)	TetR/AcrR family transcriptional regulator	Co (ccoRMk)	0.44
MK105	white	white	4262707	ccoRMk (MKAN_RS18575)	TetR/AcrR family transcriptional regulator	Co (ccoRMk)	0.44
MK106	white	white	4262707	ccoRMk (MKAN_RS18575)	TetR/AcrR family transcriptional regulator	Co (ccoRMk)	0.44
MK107	white	white	4262707	ccoRMk (MKAN_RS18575)	TetR/AcrR family transcriptional regulator	Co (ccoRMk)	0.44
MK108	white	white	4262704	ccoRMk (MKAN_RS18575)	TetR/AcrR family transcriptional regulator	Op (ccoRMk)	0.45
MK109	white	white	4262704	ccoRMk (MKAN_RS18575)	TetR/AcrR family transcriptional regulator	Op (ccoRMk)	0.45
MK110	white	white	4262703	ccoRMk (MKAN_RS18575)	TetR/AcrR family transcriptional regulator	Co (ccoRMk)	0.45
Insertions in cco1Mk
MK131	yellow	yellow	4263695	cco1Mk (MKAN_RS18580)	carotenoid oxygenase family protein	Op (cco1Mk)	0.39
MK132	yellow	yellow	4263750	cco1Mk (MKAN_RS18580)	carotenoid oxygenase family protein	Co (cco1Mk)	0.43
MK133	yellow	yellow	4264033	cco1Mk (MKAN_RS18580)	carotenoid oxygenase family protein	Op (cco1Mk)	0.62
MK134	yellow	yellow	4264303	cco1Mk (MKAN_RS18580)	carotenoid oxygenase family protein	Op (cco1Mk)	0.79
Tn insertions associated with the fnr1-desA3 (FD) locus:
Insertions in fnr1
MK136	white	white	4705002	fnr1 (MKAN_RS20530)	ferredoxin reductase	Op (fnr1)	0.12
MK137	white	white	4705128	fnr1 (MKAN_RS20530)	ferredoxin reductase	Op (fnr1)	0.23
Insertions in desA3
MK138	white	white	4706105	desA3 (MKAN_RS20535)	fatty acid desaturase	Co (desA3)	0.02
MK139	white	white	4706476	desA3 (MKAN_RS20535)	fatty acid desaturase	Co (desA3)	0.31
MK140	white	white	4707167	desA3 (MKAN_RS20535)	fatty acid desaturase	Op (desA3)	0.85
Other Tn insertions
MK13	yellow	yellow	1002552	MKAN_RS04290/MKAN_RS04295	hypothetical protein/helix-turn-helix protein	Co (MKAN_RS04295)	Intergenic
MK14	yellow	yellow	1002552	MKAN_RS04290/MKAN_RS04295	hypothetical protein/helix-turn-helix protein	Co (MKAN_RS04295)	Intergenic
MK23	yellow	yellow	1980821	MKAN_RS08360	Methyltransferase domain-containing protein	Op (MKAN_RS08360)	0.15
MK83	white	white	2481857	MKAN_RS10620	S9 family peptidase	Op (MKAN_RS10620)	0.4
MK135	white	white	4639748	MKAN_RS20220	LCP family protein	Op (MKAN_RS20220)	0.71
MK141	white	white	5109506	MKAN_RS22225	PQQ-binding-like beta-propeller repeat protein	Op (MKAN_RS20225)	0.72
MK143	white	white	6017693	MKAN_RS26135	NAD(P)-dependent oxidoreductase	Co (MKAN_RS26135)	0.04
MK144	white	white	6326926	MKAN_RS27340	AbrB/MazE/SpoVT family DNA-binding domain containing protein	Co (MKAN_RS27340)	0.29
